# Supplementary material for: Population Genetic Structure and Hybridization of Schistosoma haematobium in Nigeria
Source: MDPI journal article supplement (doi:10.3390/pathogens11040425), 2022-03-31
Supplement: s1 [file s1]

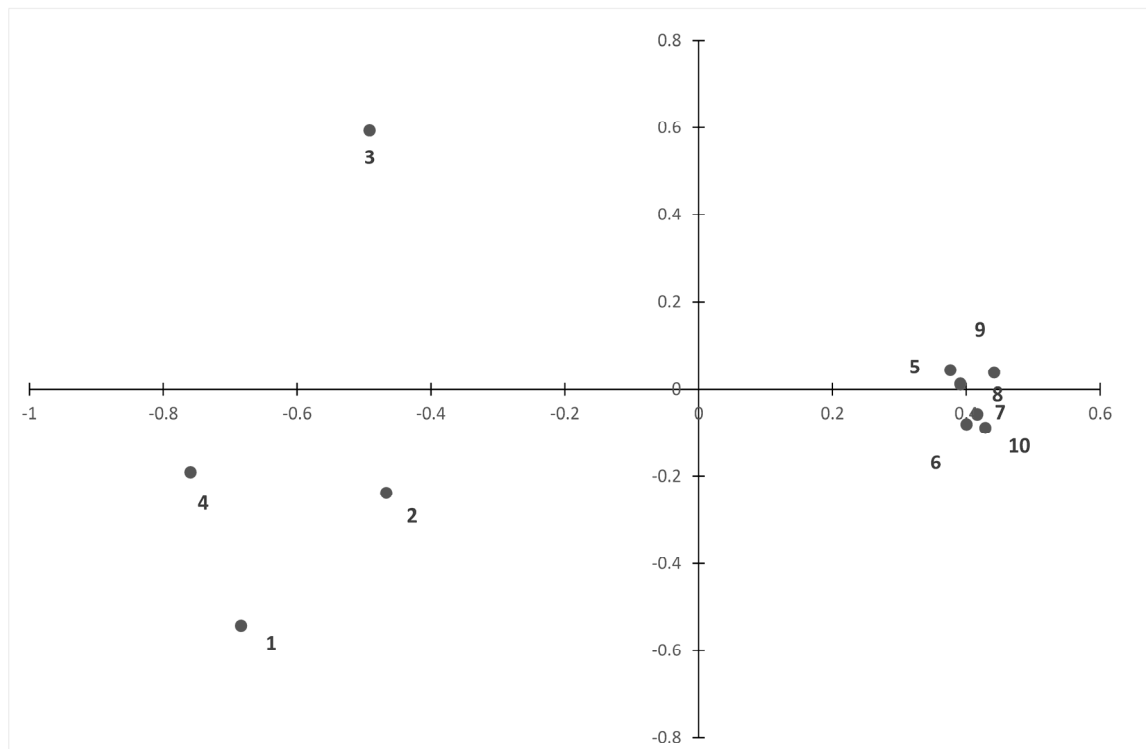

Figure S3. Population genetic structure graph assessed by principal component analysis using 2 miracidia by patient. Each sampling site is represented by a dot. The first and second axis of the PCA represent 46.2% and 16.9% respectively of the total variation in allele frequency.
