# Supplementary material for: Population Genetic Structure and Hybridization of Schistosoma haematobium in Nigeria
Source: MDPI journal article supplement (doi:10.3390/pathogens11040425), 2022-03-31
Supplement: s1 [file s1]

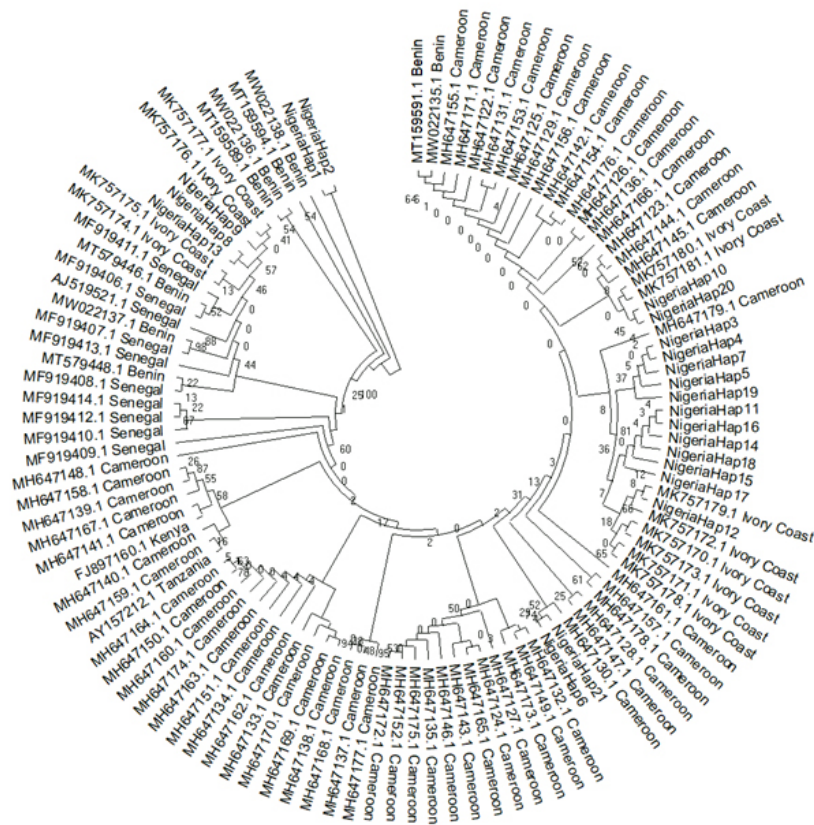

Figure S1. Maximum likelihood phylogenetic tree built with 21 (2 *S. haematobium* NigeriaHap1&2, and 19 *S. bovis* NigeriaHap3-21) haplotypes from the present study and haplotypes from Cameroon, Benin, Senegal, Cote d'Ivoire, Kenya and Tanzania from Genbank database.
